# Supplementary material for: Montelukast Disposition: No Indication of Transporter-Mediated Uptake in OATP2B1 and OATP1B1 Expressing HEK293 Cells
Source: PubMed Central journal article supplement (PMC4695834; doi:10.3390/pharmaceutics7040554), 2015-12-15
Supplement: pharmaceutics-07-00554-s001.pdf [file pharmaceutics-07-00554-s001.pdf]

## Supplementary Materials

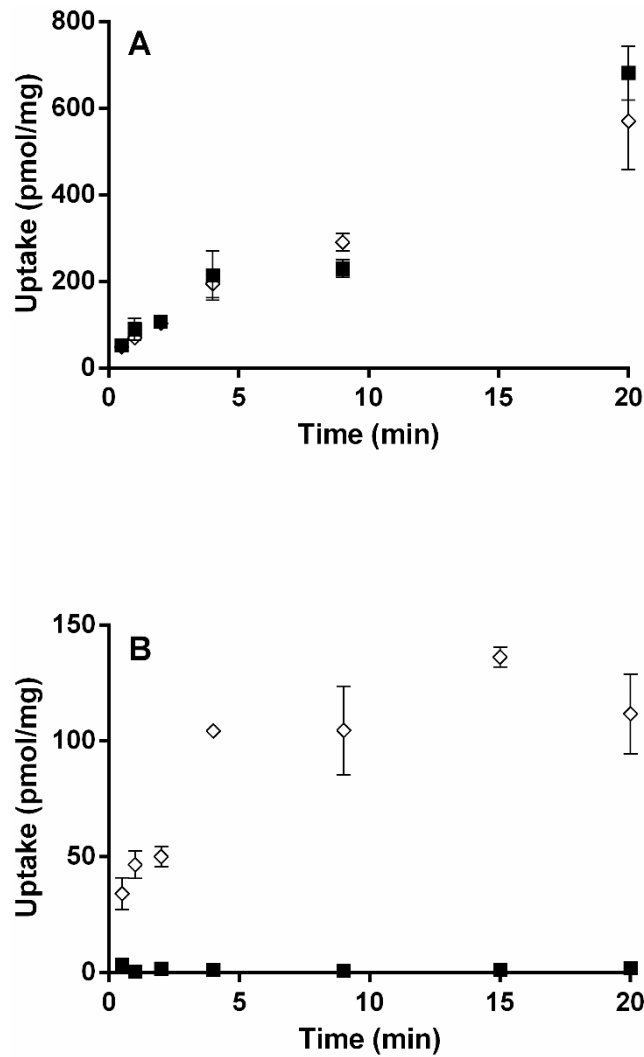

**Figure S1.** Time-dependent uptake of Montelukast (1  $\mu\text{M}$ ) and E<sub>1</sub>3S (0.5  $\mu\text{M}$ ) in HEK-OATP2B1 and HEK-mock at pH 6.5. Results are given as mean  $\pm$  S.D.,  $n = 3$ .

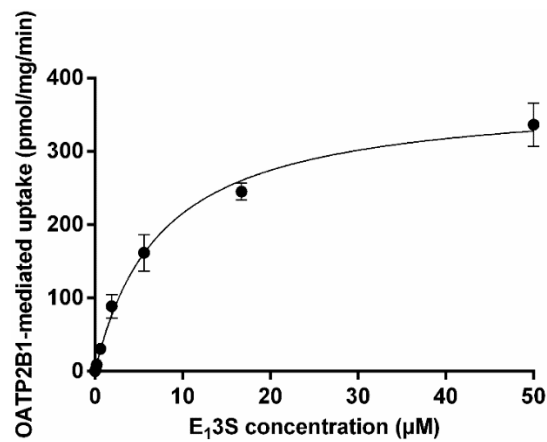

**Figure S2.** Concentration-dependent uptake of E<sub>1</sub>3S in HEK-OATP2B1 and HEK-mock at pH 6.5. OATP2B1-mediated uptake, calculated by subtracting the average uptake in HEK-mock from the average uptake in HEK-OATP2B1, was fitted to a Michaelis-Menten equation for  $K_m$  and  $V_{max}$  determination.

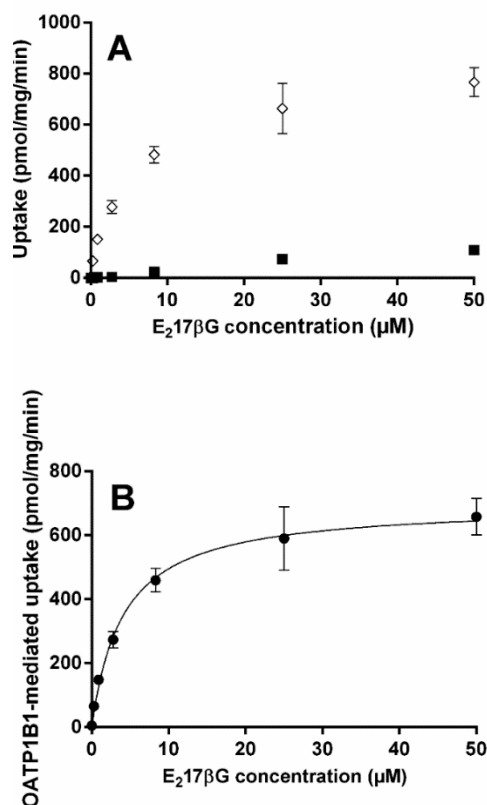

**Figure S3.** (A) Concentration-dependent uptake of E<sub>2</sub>17βG in HEK-OATP1B1 (◇) and HEK-mock (■) cells. Results are given as mean ± S.D.,  $n = 3$ . (B) OATP1B1-mediated uptake at pH 7.4, plotted against concentration of E<sub>2</sub>17βG. OATP1B1-mediated uptake, calculated by subtracting the average uptake in HEK-mock from the average uptake in HEK-OATP1B1, was fitted to a Michaelis–Menten equation for  $K_m$  and  $V_{max}$  determination.

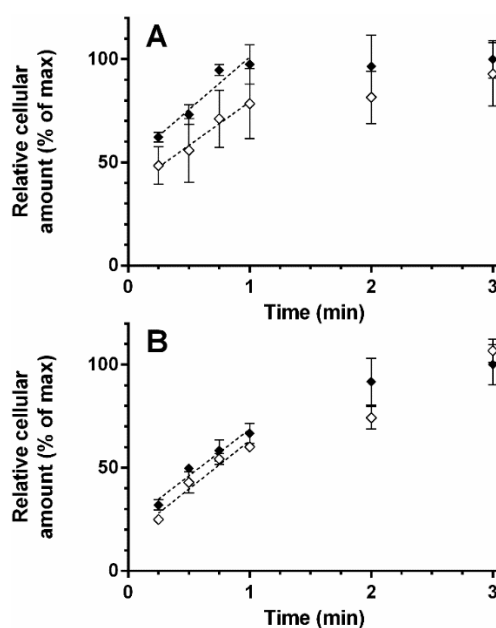

**Figure S4.** Time-dependent uptake of (A) montelukast and (B) E<sub>1</sub>3S into human hepatocytes. Incubations were performed with substrate alone (◆) and in presence of 4 μM erlotinib (◇). Relative initial uptake rates were assessed from linear fit to data obtained from 15 to 60 s (dashed). Results are given as mean ± S.D.,  $n = 3$ .
